# Supplementary material for: Self-Reported Nonadherence to Medication Is Not Associated with Health-Related Quality of Life in Parkinson’s Disease
Source: MDPI journal article supplement (doi:10.3390/brainsci11020273), 2021-02-22
Supplement: s1 [file s1]

**Self-report nonadherence to medication is not associated with health-related quality of life in Parkinson's disease**

**Supplementary Table 1**

S1: Multivariable linear regressions.

| Predictors                                                      | Unstandardized coefficients |      | Standardized coefficients | <i>t</i> | <i>p</i> |
|-----------------------------------------------------------------|-----------------------------|------|---------------------------|----------|----------|
|                                                                 | <i>b</i>                    | SE   |                           |          |          |
| Predictors of the SAMS (corrected $R^2 = 0.13$ )                |                             |      |                           |          |          |
| Constant                                                        | 10.56                       | 3.06 |                           | 3.5      | 0.001    |
| Female gender                                                   | - 2.55                      | 0.87 | 0.35                      | - 2.9    | 0.004    |
| MoCA                                                            | - 0.31                      | 0.11 | 0.34                      | - 2.8    | 0.005    |
| NMS-Q                                                           | 0.15                        | 0.09 | 0.11                      | 1.6      | 0.107    |
| Number of medications per day                                   | 0.17                        | 0.11 | 0.11                      | 1.6      | 0.112    |
| BDI                                                             | 0.11                        | 0.07 | 0.09                      | 1.5      | 0.14     |
| Predictors of PDQ-39 cognition domain (corrected $R^2 = 0.48$ ) |                             |      |                           |          |          |
| Constant                                                        | 13.4                        | 7.37 |                           | 1.8      | 0.07     |
| NMS-Q                                                           | 2.28                        | 0.25 | 0.84                      | 9.1      | < 0.001  |
| BDI                                                             | 0.66                        | 0.19 | 0.13                      | 3.5      | < 0.001  |
| MoCA                                                            | - 0.51                      | 0.27 | 0.04                      | - 1.9    | 0.065    |

BDI, Beck Depression Inventory; MoCA, Montreal Cognitive Assessment; NMS-Q, non-motor symptoms questionnaire; PDQ, Parkinson's disease questionnaire; SAMS, Stendal Adherence with Medication Score.

## Supplementary Table 2

S2: Comparison of existing cross-sectional studies on adherence and health-related quality of life

| Study                                     | Grosset et al. 2005                                                      | Grosset et al. 2009                            | Straka et al. 2019                                                                           | Our study                                                                                                         |
|-------------------------------------------|--------------------------------------------------------------------------|------------------------------------------------|----------------------------------------------------------------------------------------------|-------------------------------------------------------------------------------------------------------------------|
| Design                                    | Single-center<br>Cross-sectional                                         | Multicenter<br>Cross-sectional                 | Single-center<br>Cross-sectional                                                             | Single-center<br>Cross-sectional                                                                                  |
| N                                         | 54                                                                       | 112                                            | 124                                                                                          | 164                                                                                                               |
| Age (years)<br>(mean, SD)                 | 61.9 (11)                                                                | 65 (10)                                        | 68 (11.8)                                                                                    | 71 (9)                                                                                                            |
| MDS-UPDRS<br>III (mean, SD)               | 27 (13)                                                                  | 20 (14–27)                                     | 30.5 (10)                                                                                    | 25.8 (14)                                                                                                         |
| Disease duration<br>(years) (mean,<br>SD) | 5.4 (3.9)                                                                | 7.7 (8.2)                                      | 7 (5)                                                                                        | 9.3 (4.3)                                                                                                         |
| Depression                                | GDS 10.4 (7)                                                             | GDS 7 (4-12)                                   | GDS 8 (8)                                                                                    | BDI = 11.4 (6.6)                                                                                                  |
| Cognition                                 | MMSE 28 (2)                                                              | MMSE 29 (28-<br>30)                            |                                                                                              | MoCA 22.5 (4.2)                                                                                                   |
| Adherence<br>measure                      | Electronic<br>monitoring bottles                                         | Electronic<br>monitoring bottles               | 8-Item Morisky<br>Medication<br>Adherence<br>Scale                                           | SAMS                                                                                                              |
| HRQoL measure<br>PDQ-39 SI<br>(mean, SD)  | PDQ-39<br>29 (17)                                                        | PDQ-39<br>17 (10–28)                           | PDQ-8<br>8 (8)                                                                               | PDQ-39<br>31.4 (16.1)                                                                                             |
| Association with<br>nonadherence          | All 8 PDQ-39<br>domains (strongest<br>association for<br>social support) | MDS-UPDRS III<br>and PDQ-39<br>mobility domain | Univariate<br>correlation with<br>PDQ-8; no<br>association in<br>multivariable<br>regression | Univariate<br>correlation with<br>PDQ-39 domain<br>cognition; no<br>association in<br>multivariable<br>regression |

BDI, Beck Depression Inventory; GDS, Geriatric Depression Scale; HRQoL, health-related quality of life; MDS-UPDRS, Movement Disorder Society-sponsored revision of the Unified Parkinson's Disease Rating Scale; MMSE, Mini-Mental State Examination; MoCA, Montreal Cognitive Assessment; PDQ-39 SI, Parkinson's disease questionnaire (39 items) summary index; SAMS, Stendal Adherence with Medication Score.
